# Supplementary material for: An alkali metal phosphate RbPbBi2(PO4)3 with three kinds of disorder: the effect of isolated soft cation units on the crystal structure
Source: Royal Society of Chemistry journal article supplement (doi:10.1039/c9qi00591a), 2019-01-01
Supplement: c9qi00591a1.pdf [file c9qi00591a1.pdf]

**An alkali metal phosphate  $\text{RbPbBi}_2(\text{PO}_4)_3$  with three kinds of  
disorder: The effect of isolated soft cation units on the crystal  
structure**

Ming Wen,<sup>a</sup> Hongping Wu,<sup>b</sup> Zhihua Yang,<sup>b</sup> Xiaohong Wu,<sup>\*a</sup> and Shilie  
Pan<sup>\*ab</sup>

*<sup>a</sup> School of Chemistry and Chemical Engineering, Harbin Institute of Technology,  
Harbin Heilongjiang 150001, China.*

*<sup>b</sup> CAS Key Laboratory of Functional Materials and Devices for Special Environments,  
Xinjiang Technical Institute of Physics & Chemistry, CAS; Xinjiang Key Laboratory  
of Electronic Information Materials and Devices, 40-1 South Beijing Road, Urumqi  
830011, China.*

*wuxiaohong@hit.edu.cn, slpan@ms.xjb.ac.cn*

**Table S1.** Crystal data and structure refinements for RbPbBi<sub>2</sub>(PO<sub>4</sub>)<sub>3</sub>.

| Empirical formula                                                                                      | RbPbBi <sub>2</sub> (PO <sub>4</sub> ) <sub>3</sub> |
|--------------------------------------------------------------------------------------------------------|-----------------------------------------------------|
| Temperature                                                                                            | 296(2) K                                            |
| Wavelength                                                                                             | 0.71073 Å                                           |
| Crystal system                                                                                         | Trigonal                                            |
| Space group                                                                                            | <i>P</i> 3 <sub>1</sub> 21                          |
| Formula weight                                                                                         | 995.53                                              |
| <i>a</i> (Å)                                                                                           | 7.191(6)                                            |
| <i>b</i> (Å)                                                                                           | 7.191(6)                                            |
| <i>c</i> (Å)                                                                                           | 6.563(11)                                           |
| <i>Z</i> , Volume (Å <sup>3</sup> )                                                                    | 1, 293.9(7)                                         |
| $\rho_{\text{Calcd}}$ (Mg/m <sup>3</sup> )                                                             | 5.624                                               |
| $\mu$ (/mm)                                                                                            | 48.724                                              |
| F(000)                                                                                                 | 426                                                 |
| R(int)                                                                                                 | 0.0589                                              |
| Goodness-of-fit on F <sup>2</sup>                                                                      | 1.075                                               |
| Final R indices [F <sub>o</sub> <sup>2</sup> >2 $\sigma$ ( F <sub>o</sub> <sup>2</sup> )] <sup>a</sup> | R1 = 0.0355,<br>wR2 = 0.0789                        |
| R indices (all data) <sup>a</sup>                                                                      | R1 = 0.0503,<br>wR2 = 0.0880                        |
| Absolute structure parameter                                                                           | 0.05(4)                                             |
| Largest diff. peak and hole (e <sup>-</sup> Å <sup>-3</sup> )                                          | 3.715 and -2.455                                    |

$$^a R_1 = \sum ||F_o| - |F_c|| / \sum |F_o| \text{ and } wR_2 = [\sum w(F_o^2 - F_c^2)^2 / \sum w F_o^4]^{1/2} \text{ for } F_o^2 > 2\sigma(F_o^2)$$

**Table S2.** Atomic coordinates ( $\times 10^4$ ) and equivalent isotropic displacement parameters ( $\text{\AA}^2 \times 10^3$ ) for  $\text{RbPbBi}_2(\text{PO}_4)_3$ .  $U_{\text{eq}}$  is defined as one-third of the trace of the orthogonalized  $U_{ij}$  tensor.

| Atom   | x         | y        | z        | U(eq) |
|--------|-----------|----------|----------|-------|
| Bi(1)  | 0         | 4961(2)  | 11667    | 16(1) |
| Pb(1)  | 0         | 4961(2)  | 11667    | 16(1) |
| Rb(11) | 470(20)   | 280(30)  | 9445(18) | 3(3)  |
| Rb(12) | 400(30)   | 0        | 8333     | 3(3)  |
| P(1)   | 0         | 4469(12) | 6667     | 10(2) |
| O(1)   | 1200(30)  | 6330(30) | 8210(20) | 23(5) |
| O(2)   | -1490(20) | 2480(30) | 7940(30) | 19(4) |

**Table S3.** Selected bond distances (Å) and angles (deg) for RbPbBi<sub>2</sub>(PO<sub>4</sub>)<sub>3</sub>.

|                         |                         |                           |                         |
|-------------------------|-------------------------|---------------------------|-------------------------|
| Bi(1)-O(2)#1            | 2.282(15)               | O(2)#1-Bi(1)-O(1)#4       | 78.6(5)                 |
| Bi(1)-O(2)#2            | 2.282(15)               | O(2)#2-Bi(1)-O(1)#4       | 162.2(5)                |
| Bi(1)-O(1)              | 2.454(18)               | O(1)-Bi(1)-O(1)#4         | 80.1(6)                 |
| Bi(1)-O(1)#3            | 2.454(18)               | O(1)#3-Bi(1)-O(1)#4       | 114.0(5)                |
| Bi(1)-O(1)#4            | 2.67(2)                 | O(2)#1-Bi(1)-O(1)#5       | 162.2(5)                |
| Bi(1)-O(1)#5            | 2.67(2)                 | O(2)#2-Bi(1)-O(1)#5       | 78.6(5)                 |
| Rb(11)-O(2)             | 2.78(2)                 | O(1)-Bi(1)-O(1)#5         | 114.0(5)                |
| Rb(11)-O(2)#8           | 2.83(2)                 | O(1)#3-Bi(1)-O(1)#5       | 80.1(6)                 |
| Rb(11)-O(2)#7           | 2.92(2)                 | O(1)#4-Bi(1)-O(1)#5       | 117.5(7)                |
| Rb(11)-O(1)#10          | 2.94(2)                 | O(2)-Rb(11)-O(2)#8        | 67.9(7)                 |
| Rb(11)-O(2)#6           | 2.96(2)                 | O(2)-Rb(11)-O(2)#7        | 164.4(5)                |
| Rb(11)-O(1)#10          | 3.24(2)                 | O(2)#8-Rb(11)-O(2)#7      | 115.1(6)                |
| Rb(11)-O(1)#10          | 3.24(2)                 | O(2)-Rb(11)-O(1)#10       | 95.2(6)                 |
| Rb(12)-O(2)#8           | 2.74(3)                 | O(2)#8-Rb(11)-O(1)#10     | 155.9(7)                |
| Rb(12)-O(2)             | 2.74(3)                 | O(2)#7-Rb(11)-O(1)#10     | 85.9(6)                 |
| Rb(12)-O(1)#11          | 2.97(3)                 | O(2)-Rb(11)-O(2)#6        | 115.3(5)                |
| Rb(12)-O(1)#10          | 2.97(3)                 | O(2)#8-Rb(11)-O(2)#6      | 51.0(6)                 |
| Rb(12)-O(2)#8           | 3.202(3)                | O(2)#7-Rb(11)-O(2)#6      | 64.4(7)                 |
| Rb(12)-O(2)             | 3.202(3)                | O(1)#10-Rb(11)-O(2)#6     | 149.4(8)                |
| Rb(12)-O(2)#8           | 3.312(3)                | O(2)#8-Rb(12)-O(2)        | 69.6(8)                 |
| Rb(12)-O(2)             | 3.312(3)                | O(2)#8-Rb(12)-O(1)#11     | 95.4(5)                 |
| P(1)-O(2)               | 1.536(16)               | O(2)-Rb(12)-O(1)#11       | 162.6(7)                |
| P(1)-O(2)#12            | 1.536(16)               | O(2)#8-Rb(12)-O(1)#10     | 162.6(7)                |
| P(1)-O(1)#12            | 1.551(18)               | O(2)-Rb(12)-O(1)#10       | 95.4(5)                 |
| P(1)-O(1)               | 1.551(18)               | O(1)#11-Rb(12)-O(1)#10    | 100.7(9)                |
| O(2)#1-Bi(1)-O(2)#2     | 86.7(8)                 | O(2)-P(1)-O(2)#12         | 108.8(14)               |
| O(2)#1-Bi(1)-O(1)       | 74.6(6)                 | O(2)-P(1)-O(1)#12         | 113.8(8)                |
| O(2)#2-Bi(1)-O(1)       | 86.3(6)                 | O(2)#12-P(1)-O(1)#12      | 106.2(10)               |
| O(2)#1-Bi(1)-O(1)#3     | 86.3(6)                 | O(2)-P(1)-O(1)            | 106.2(10)               |
| O(2)#2-Bi(1)-O(1)#3     | 74.6(6)                 | O(2)#12-P(1)-O(1)         | 113.8(8)                |
| O(1)-Bi(1)-O(1)#3       | 153.8(8)                | O(1)#12-P(1)-O(1)         | 108.3(13)               |
| #1 $y, x+1, -z+2$       | #2 $-y, x-y+1, z+1/3$   | #3 $-x, -x+y, -z+7/3$     |                         |
|                         | #4 $-y+1, x-y+1, z+1/3$ | #5 $y-1, x, -z+2$         |                         |
|                         | #6 $-y, x-y, z+1/3$     | #7 $y, x, -z+2$           | #8 $x-y, -y, -z+5/3$    |
|                         | #9 $-x+y, -x, z-1/3$    | #10 $x-y+1, -y+1, -z+5/3$ |                         |
|                         | #11 $x, y-1, z$         | #12 $-x, -x+y, -z+4/3$    | #13 $x-y, -y+1, -z+5/3$ |
| #14 $-x+y, -x+1, z-1/3$ | #15 $x, y+1, z$         | #16 $-x+y-1, -x, z-1/3$   |                         |

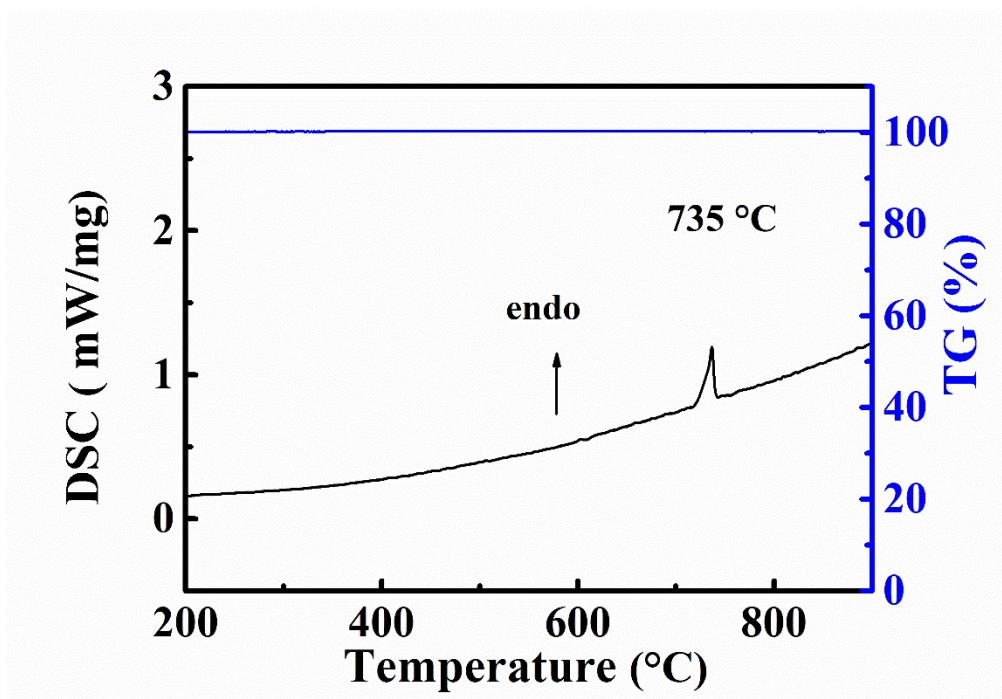

Fig. S1. TG-DSC curves of RbPbBi<sub>2</sub>(PO<sub>4</sub>)<sub>3</sub>.

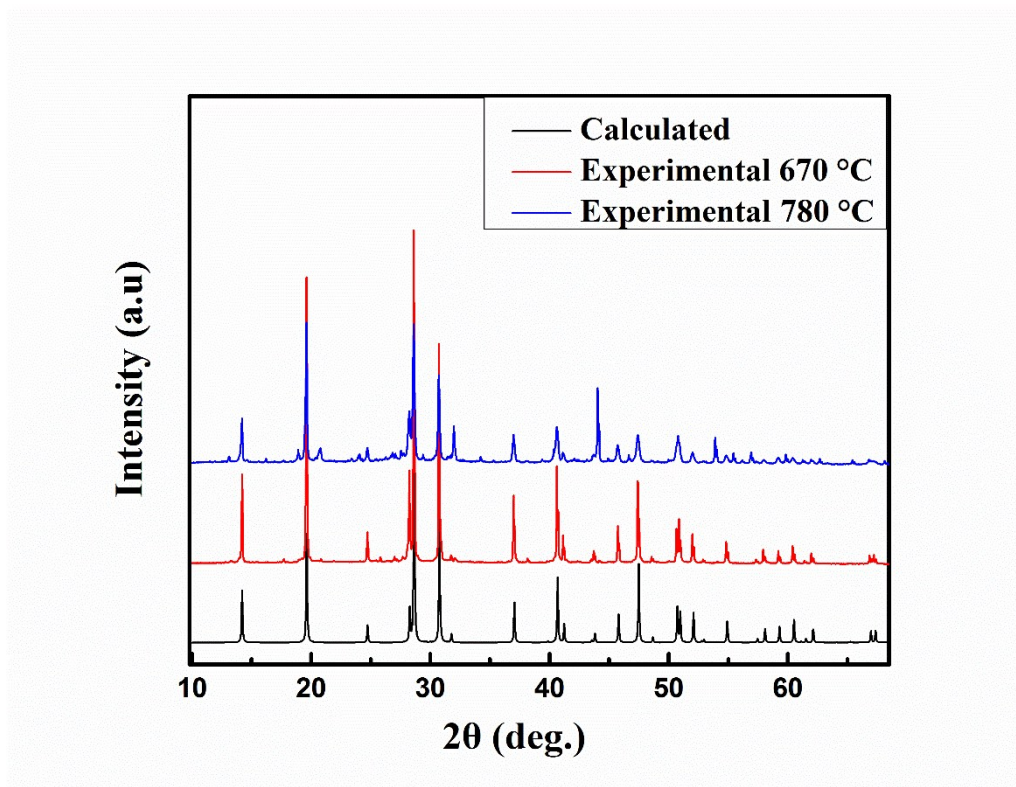

**Fig. S2.** Experimental and calculated XRD patterns of  $\text{RbPbBi}_2(\text{PO}_4)_3$ .

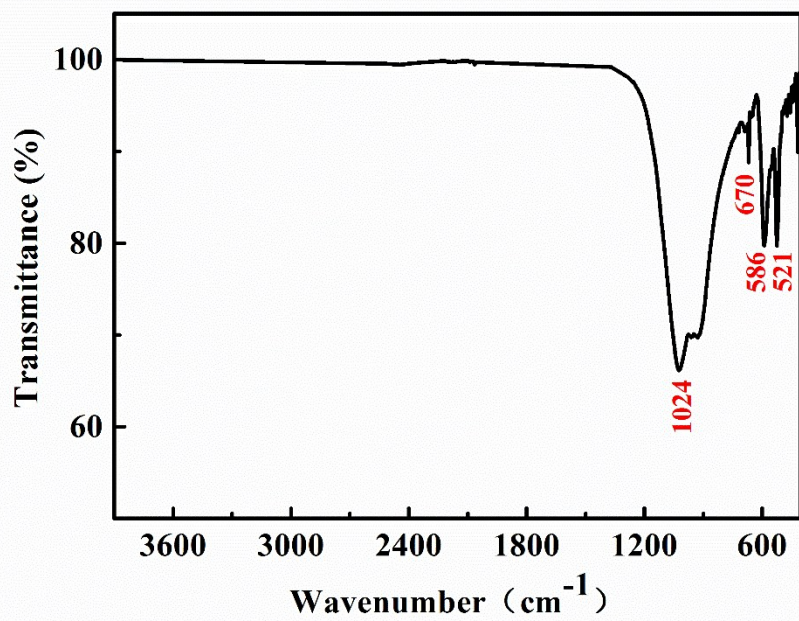

Fig. S3. IR spectrum of RbPbBi<sub>2</sub>(PO<sub>4</sub>)<sub>3</sub>.
